# Supplementary material
Source: publisher figshare collection journal article supplement (https://acs.figshare.com/ndownloader/files/5822181)
Supplement: Supplementary file 1 [file 5822181]

## Supporting Information Figure Captions

- S1. Normalised force versus separation curve for a silica tip interacting with a silica flat plate (thermally oxidised silicon wafer) in aqueous CTAB [1.6 mM] solution. The solid lines correspond to interaction at constant charge (upper limit) and constant potential (lower limit) fitted with  $R_{\text{eff}} = 700 \text{ nm}$ ,  $\kappa^{-1} = 13.65 \text{ nm}$  and  $\Psi_d = 90 \text{ mV}$ .
- S2. Typical normalised force of interaction ( $R_{\text{eff}} = 700 \text{ nm}$ ) for the glutaric dialdehyde/tip system on surface approach (triangles) and upon separation (squares) measured in Milli-Q water at natural pH.
- S3. Force maps of an oocyst obtained with a silica tip at 0.2 mM  $\text{KNO}_3$  and pH 3.85. Maps correspond to height (a) constant compliance (b), decay length of the repulsive force (c) and the extrapolated (to zero separation; see text) magnitude of the repulsive force (d).
- S4. Force maps of an oocyst obtained with a silica tip at 0.2 mM  $\text{KNO}_3$  and pH 8.23. Maps correspond to height (a) constant compliance (b), decay length of the repulsive force (c) and the extrapolated (to zero separation; see text) magnitude of the repulsive force (d).

2

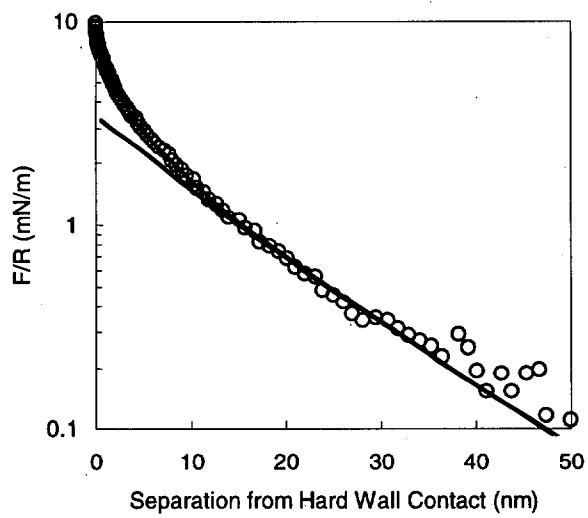

Figure S1

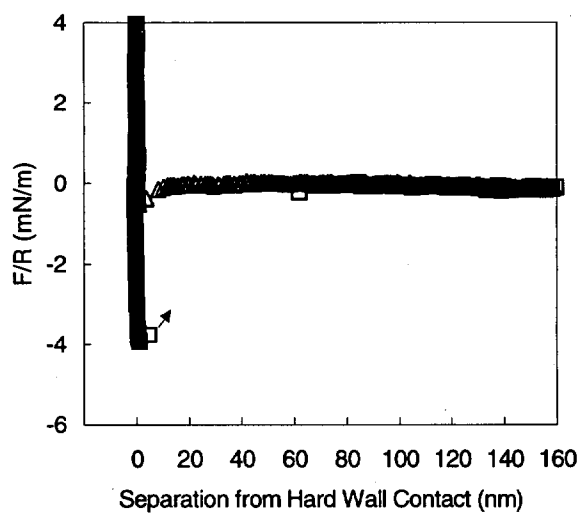

Figure S2

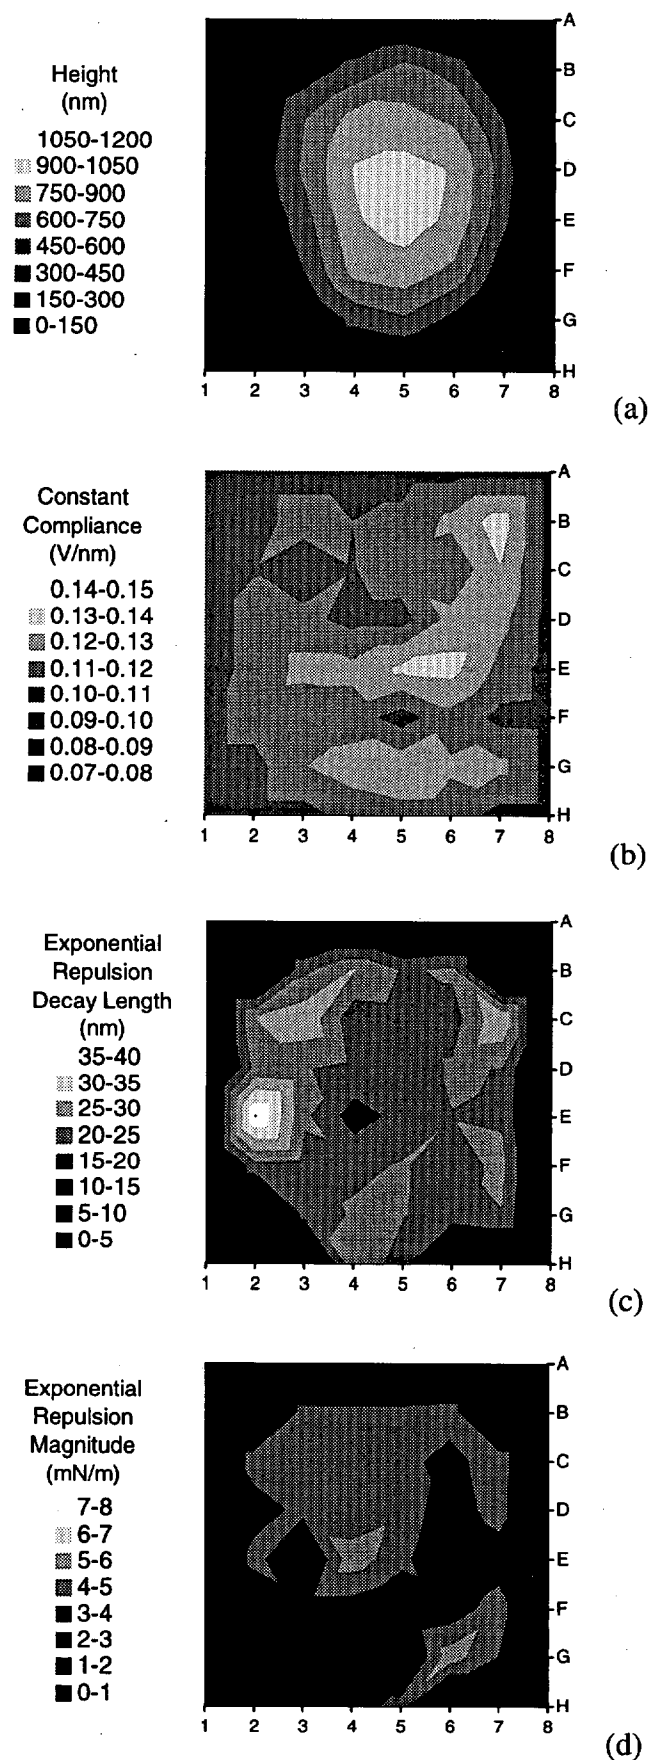

Figure S3

4

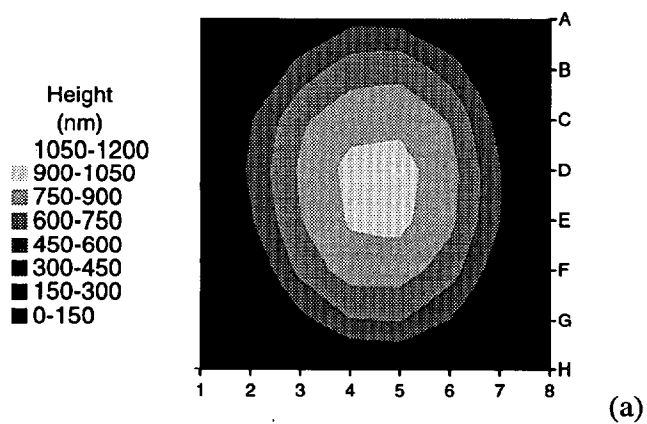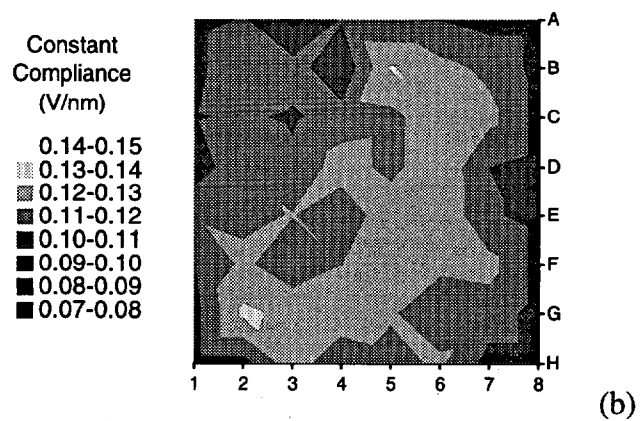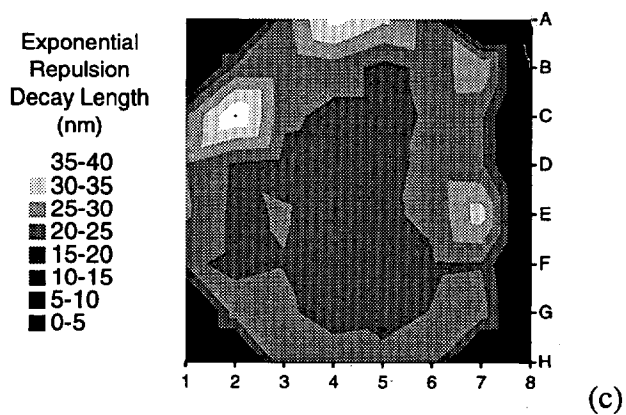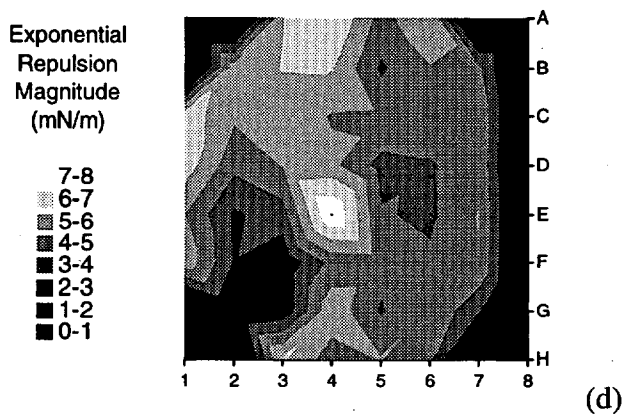

Figure S4
